# Supplementary material for: Integrating Genetic Ancestry into Clinical Care: Accuracy, Utility, and Stakeholder Views
Source: bioRxiv or medRxiv preprint supplement (doi:10.1101/2024.05.01.24306719), 2024-05-03
Supplement: Supplementary file [file media-1.pdf]

Supplemental Tables and Figures

**Supplemental Table 1. Genetic ancestry reporting from each genetic ancestry provider and Apex-reported race/ethnicity.**

| Genetic Ancestry Groupings | Ancestry 1                                                                                                                                                 | Ancestry 2    | Apex-Reported Race/Ethnicity                           |
|----------------------------|------------------------------------------------------------------------------------------------------------------------------------------------------------|---------------|--------------------------------------------------------|
| African (AFR)              | African Ancestry (SW US)<br>African Caribbean<br>Luhya (Kenya)<br>Mende (Sierra Leone)<br>Gambian Mendinka<br>Esan (S Nigeria)<br>Yoruba (Nigeria & Benin) | Not specified | Black or African American                              |
| Admixed American (AMR)     | Puerto Rican<br>Peruvian<br>Colombian<br>Mexican                                                                                                           | Not specified | Hispanic or Latino<br>American Indian or Alaska Native |
| East Asian (EAS)           | Northern Chinese<br>Southern Chinese<br>Vietnamese<br>Dai (SW China)<br>Japanese                                                                           | Not specified | Asian<br>Hawaii Native or Other Pacific Islander       |
| European (EUR)             | English & Scottish<br>Italian<br>Finnish<br>N&W European<br>Iberian (Spain & Portugal)                                                                     | Not specified | White or Caucasian                                     |
| South Asian (SAS)          | Punjabi (Pakistan)<br>Bengali<br>Gujarati (W India)<br>Tamil Nadu-India<br>Telugu (SE India)                                                               | Not specified | Asian                                                  |

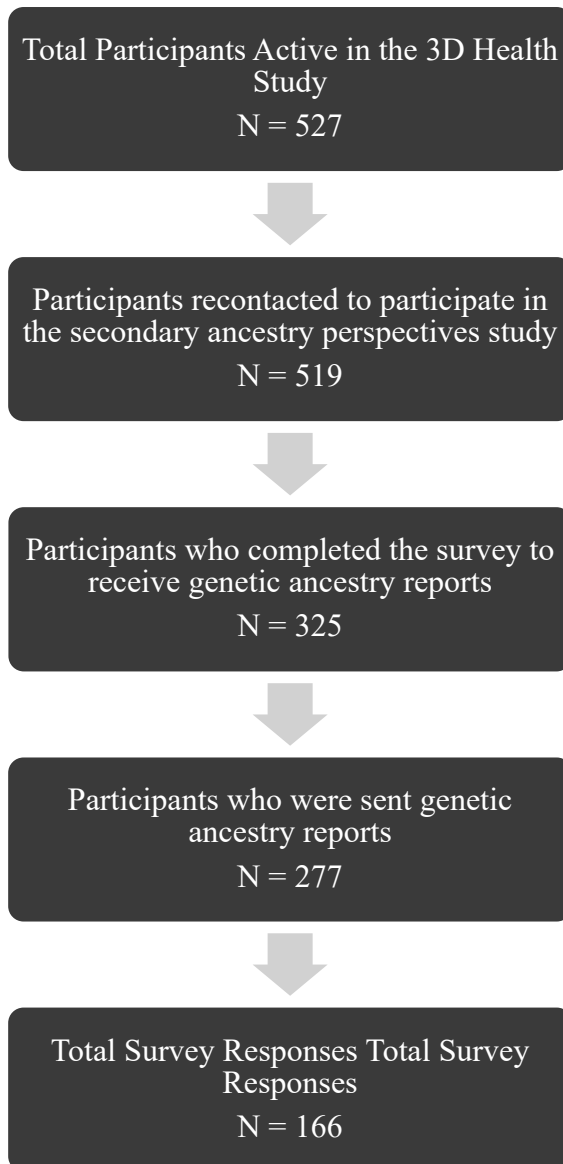

**Supplemental Figure 1. Flowchart of the 3D Health Study participants active and recontacted to receive genetic ancestry reports and complete the additional ancestry perspectives survey.**

**Supplemental Table 2. 3D Health Study Participant Demographics.**

| Variable                                  | Completed Survey (N=166)<br>n, % |
|-------------------------------------------|----------------------------------|
| <b>Gender</b>                             |                                  |
| Man                                       | 64 (38.6)%                       |
| Woman                                     | 101 (60.8)%                      |
| Non-binary                                | 0 (0.0)%                         |
| Prefer not to answer                      | 1 (0.6)%                         |
| <b>Age</b>                                |                                  |
| Below 30                                  | 7 (4.2)%                         |
| 30-45                                     | 49 (29.5)%                       |
| 45-60                                     | 27 (16.3)%                       |
| 60 or above                               | 82 (49.4)%                       |
| Prefer not to answer                      | 1 (0.6)%                         |
| <b>Race/Ethnicity <sup>a</sup></b>        |                                  |
| American Indian/Alaska Native             | 1 (0.6)%                         |
| Asian                                     | 34 (20.5)%                       |
| Black/African American                    | 4 (2.4)%                         |
| Hispanic/Latino                           | 9 (5.4)%                         |
| Native Hawaiian/Pacific Islander          | 0 (0.0)%                         |
| White                                     | 124 (74.7)%                      |
| Other                                     | 10 (6.0)%                        |
| <b>Had Prior Genetic Ancestry testing</b> |                                  |
| Yes                                       | 74 (44.6)%                       |
| No                                        | 89 (53.6)%                       |
| Missing                                   | 3 (1.8)%                         |

<sup>a</sup> Participants were allowed to select more than one race/ethnicity.

**Supplemental Table 3. UCSF Provider demographics**

| Variable                                  | Completed Survey (N=31)<br>n, % |
|-------------------------------------------|---------------------------------|
| <b>Gender</b>                             |                                 |
| Man                                       | 5 (16.1)%                       |
| Woman                                     | 25 (80.6)%                      |
| Non-binary                                | 0 (0.0)%                        |
| Prefer not to answer                      | 1 (3.2)%                        |
| <b>Age</b>                                |                                 |
| Below 30                                  | 0 (0.0)%                        |
| 30-45                                     | 18 (58.1)%                      |
| 45-60                                     | 11 (35.5)%                      |
| 60 or above                               | 2 (6.5)%                        |
| Prefer not to answer                      | 0 (0.0)%                        |
| <b>Race/Ethnicity <sup>a</sup></b>        |                                 |
| American Indian/Alaska Native             | 0 (0.0)%                        |
| Asian                                     | 9 (29.0)%                       |
| Black/African American                    | 2 (6.5)%                        |
| Hispanic/Latino                           | 2 (6.5)%                        |
| Native Hawaiian/Pacific Islander          | 0 (0.0)%                        |
| White                                     | 21 (67.7)%                      |
| Other                                     | 3 (9.7)%                        |
| <b>Specialty</b>                          |                                 |
| Internal Medicine                         | 12 (38.7)%                      |
| Family Medicine                           | 2 (6.5)%                        |
| Genetics                                  | 1 (3.2)%                        |
| Genetic Counseling                        | 14 (45.2)%                      |
| Other                                     | 2 (6.5)%                        |
| <b>Had Prior Genetic Ancestry testing</b> |                                 |
| Yes                                       | 5 (16.1)%                       |
| No                                        | 26 (83.9)%                      |

<sup>a</sup> Participants were allowed to select more than one race/ethnicity.

**Supplemental Table 4. Concordance between genetic ancestry calculations.** Genetic ancestry results from two commercial genetic testing providers and two 3<sup>rd</sup>-party analyses were compared using genetic samples in the UCSF 3D Health Study. The agreement was determined by the % of overlapping ancestry from each ancestry location (European, African, Asian, and Admixed American). P values were determined using a Wilcoxon Rank sum test.

| Ancestry 1 vs. Ancestry 3 (n=460) |        |         |         |        | P-values |           |           |
|-----------------------------------|--------|---------|---------|--------|----------|-----------|-----------|
| Agreement                         | Min    | Median  | Max     | Mean   |          |           |           |
| Overall                           | 0.00%  | 54.65%  | 94.91%  | 57.00% |          |           |           |
| Genetic Ancestry                  |        |         |         |        | Afr      | As        | Adm       |
| European (333)                    | 26.00% | 53.41%  | 78.03%  | 53.34% | 6.0e-5** | 6.6e-22** | 0.63      |
| African (9)                       | 53.57% | 79.99%  | 94.91%  | 76.18% |          | 0.37      | 9.8e-4**  |
| Asian (75)                        | 36.45% | 78.26%  | 89.94%  | 72.90% |          |           | 5.7e-6**  |
| Admixed American (18)             | 0.00%  | 53.34%  | 72.78%  | 52.52% |          |           |           |
| Ancestry 1 vs. Ancestry 4 (n=460) |        |         |         |        |          |           |           |
| Agreement                         | Min    | Median  | Max     | Mean   |          |           |           |
| Overall                           | 0.00%  | 54.79%  | 95.21%  | 57.26% |          |           |           |
| Genetic Ancestry                  |        |         |         |        |          |           |           |
| European (333)                    | 32.27% | 52.96%  | 79.67%  | 53.12% | 2.5e-3** | 1.6e-29** | 1.3e-3**  |
| African (9)                       | 47.92% | 79.99%  | 95.21%  | 73.69% |          | 0.75      | 0.076     |
| Asian (75)                        | 38.66% | 78.67%  | 89.94%  | 74.53% |          |           | 9.4e-6**  |
| Admixed American (18)             | 0.00%  | 62.70%  | 74.77%  | 58.21% |          |           |           |
| Ancestry 2 vs. Ancestry 3 (n=465) |        |         |         |        |          |           |           |
| Agreement                         | Min    | Median  | Max     | Mean   |          |           |           |
| Overall                           | 33.50% | 99.87%  | 100.00% | 95.80% |          |           |           |
| Genetic Ancestry                  |        |         |         |        |          |           |           |
| European (337)                    | 33.50% | 99.90%  | 100.00% | 97.24% | 7.5e-4** | 4.0e-3**  | 1.3e-9**  |
| African (9)                       | 92.73% | 94.53%  | 97.10%  | 94.97% |          | 2.1e-4**  | 6.0e-4**  |
| Asian (74)                        | 78.60% | 100.00% | 100.00% | 97.62% |          |           | 3.7e-10** |
| Admixed American (18)             | 38.72% | 65.15%  | 100.00% | 66.83% |          |           |           |
| Ancestry 2 vs. Ancestry 4 (n=465) |        |         |         |        |          |           |           |
| Agreement                         | Min    | Median  | Max     | Mean   |          |           |           |
| Overall                           | 58.68% | 100.00% | 100.00% | 95.70% |          |           |           |
| Genetic Ancestry (n)              |        |         |         |        |          |           |           |
| European (337)                    | 58.68% | 100.00% | 100.00% | 97.33% | 3.5e-5** | 2.4e-15** | 2.3e-12** |
| African (9)                       | 83.13% | 95.52%  | 98.62%  | 94.37% |          | 0.040*    | 3.1e-3**  |
| Asian (74)                        | 71.67% | 97.97%  | 100.00% | 94.65% |          |           | 6.3e-6**  |
| Admixed American (18)             | 58.72% | 75.65%  | 100.00% | 78.32% |          |           |           |
| Ancestry 3 vs. Ancestry 4 (n=474) |        |         |         |        |          |           |           |
| Agreement                         | Min    | Median  | Max     | Mean   |          |           |           |
| Overall                           | 58.77% | 99.41%  | 100.00% | 97.05% |          |           |           |
| Genetic Ancestry (n)              |        |         |         |        |          |           |           |

|                       |        |        |         |        |          |           |          |
|-----------------------|--------|--------|---------|--------|----------|-----------|----------|
| European (344)        | 71.90% | 99.72% | 100.00% | 98.76% | 2.3e-4** | 1.3e-13** | 6.0e-9** |
| African (9)           | 81.30% | 98.48% | 99.01%  | 96.39% |          | 0.90      | 6.2e-3*  |
| Asian (76)            | 62.90% | 97.91% | 100.00% | 93.54% |          |           | 1.7e-3** |
| Admixed American (18) | 58.77% | 89.40% | 100.00% | 86.08% |          |           |          |

\*P < 0.05; \*\*P<0.005

**Supplemental Table 5. Pare-wise comparisons of the concordance of the four ancestries when compared to Apex-reported ancestry.** McNemar's test was used on each pairwise comparison.

| Comparison   | Threshold |           |           |
|--------------|-----------|-----------|-----------|
|              | 50%       | 75%       | 90%       |
| Ancestry 1/2 | 5.0e-24** | 1.7e-70** | 9.6e-74** |
| Ancestry 1/3 | 1.4e-21** | 6.4e-71** | 3.8e-81** |
| Ancestry 1/4 | 1.5e-22** | 1.4e-71** | 3.1e-82** |
| Ancestry 2/3 | 0.21      | >0.99     | 4.0e-7**  |
| Ancestry 2/4 | 0.23      | 0.45      | 1.1e-8**  |
| Ancestry 3/4 | >0.99     | 0.131     | 0.041*    |

\*P < 0.05; \*\*P<0.005

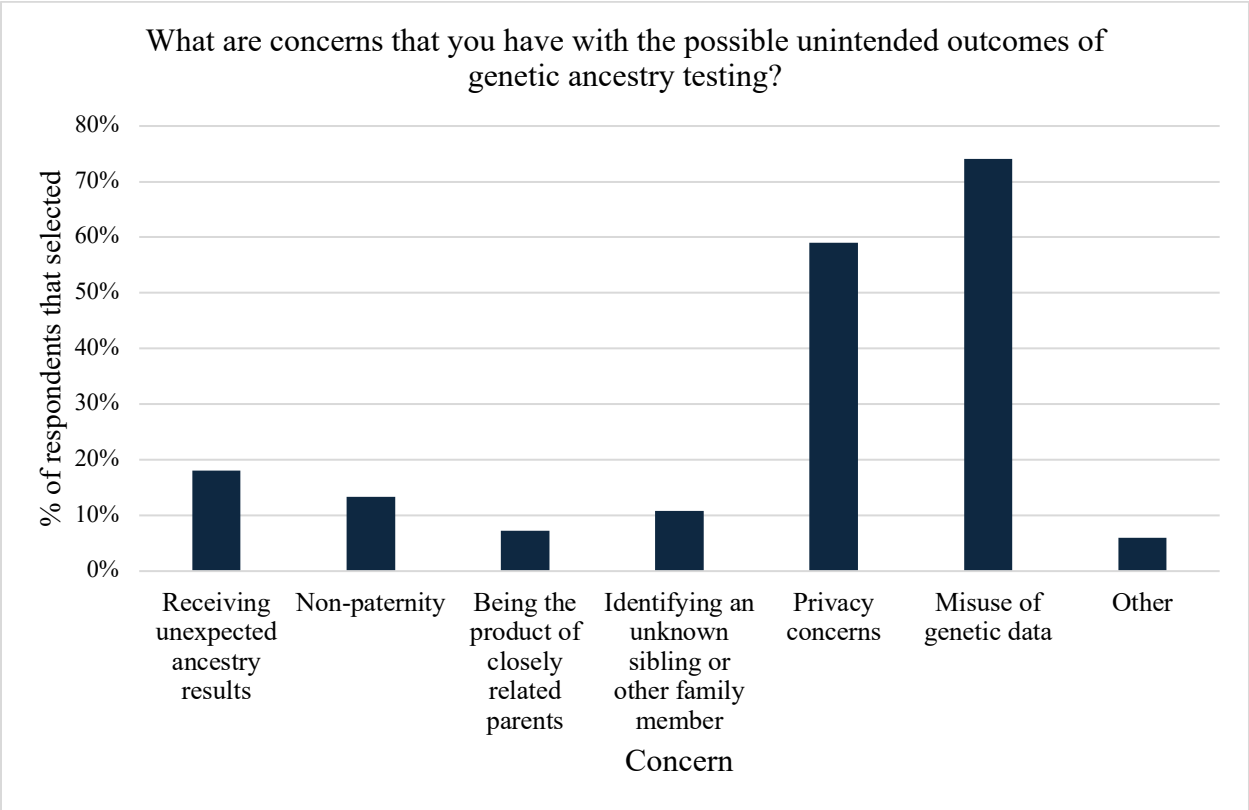

**Supplemental Figure 2. 3D Health Participant concerns about the possible unintended outcomes of genetic ancestry testing.**



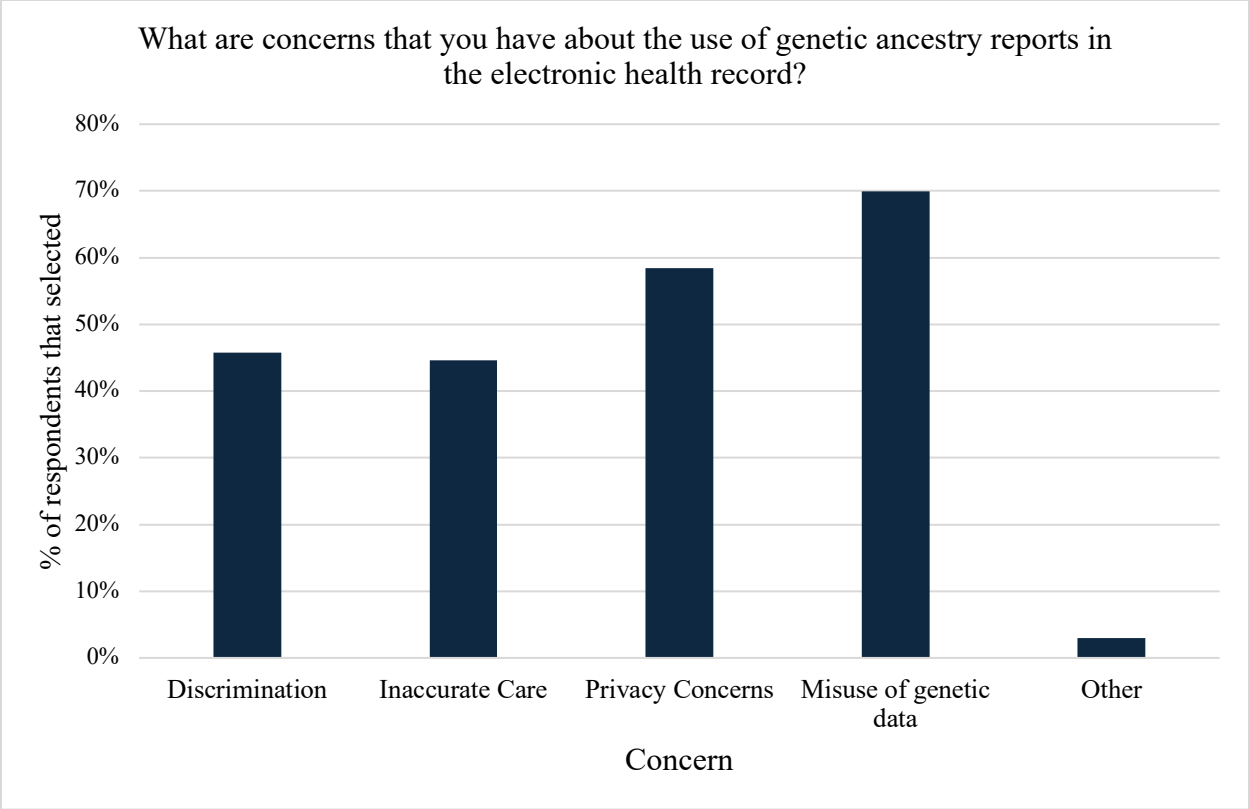

**Figure 3. 3D Health Participant concerns on the use of genetic ancestry reports in the electronic health record.**

**Supplemental Table 6. Provider perspectives on the integration of genetic ancestry into the electronic health record.** Responses were totaled for the overall responses from all providers and then calculated based on the participant's self-identified race/ethnicity. Providers who selected more than one race/ethnicity that did not fit into one of the general ancestry categories were placed into other. A Fisher's Exact test was used to determine if there was a statistically significant difference in responses between ancestry groups.

| Genetic ancestry reports should be in the electronic health record. | Strongly disagree | Somewhat disagree | Neutral    | Somewhat agree | Strongly agree | P-value |
|---------------------------------------------------------------------|-------------------|-------------------|------------|----------------|----------------|---------|
|                                                                     | 2 (6.5)%          | 6 (19.4)%         | 16 (51.6)% | 7 (22.6)%      | 0 (0.0)%       |         |
| European (n=18)                                                     | 1 (5.6)%          | 4 (22.2)%         | 8 (44.4)%  | 5 (27.8)%      | 0 (0.0)%       | 0.9913  |
| African (n=1)                                                       | 0 (0.0)%          | 0 (0.0)%          | 1 (100.0)% | 0 (0.0)%       | 0 (0.0)%       |         |
| Asian (n=7)                                                         | 1 (14.3)%         | 1 (14.3)%         | 4 (57.1)%  | 1 (14.3)%      | 0 (0.0)%       |         |
| Admixed American (n=1)                                              | 0 (0.0)%          | 0 (0.0)%          | 1 (100.0)% | 0 (0.0)%       | 0 (0.0)%       |         |
| Other (n=4)                                                         | 0 (0.0)%          | 1 (25.0)%         | 2 (50.0)%  | 1 (25.0)%      | 0 (0.0)%       |         |
